# Supplementary material for: Improving the photocatalytic activity of s-triazine based graphitic carbon nitride through metal decoration: an ab initio investigation
Source: Royal Society of Chemistry journal article supplement (doi:10.1039/c6cp03126a), 2016-01-01
Supplement: c6cp03126a1.pdf [file c6cp03126a1.pdf]

## **Improving the Photocatalytic Activity of s-triazine Based Graphitic Carbon Nitride through Metal Decoration: An *ab initio* Investigation**

**K. Srinivasu, Brindaban Modak and Swapan K. Ghosh\***

Theoretical Chemistry Section, Bhabha Atomic Research Centre

and Homi Bhabha National Institute, Mumbai, India

E-mail: [skghosh@barc.gov.in](mailto:skghosh@barc.gov.in)

**Table S1:** The calculated energy difference between the impurity state maximum and Fermi level ( $\Delta(I-F)$ ) and Fermi level and Conduction band minimum ( $\Delta(F-C)$ ) from the HSE03 functional.

| System | $\Delta(I-F)$ | $\Delta(F-C)$ |
|--------|---------------|---------------|
| PCN-Sc | 0.14          | 0.16          |
| PCN-Ti | 0.15          | 0.02          |
| PCN-V  | 0.22          | 0.22          |
| PCN-Cr | 0.09          | 0.09          |
| PCN-Mn | 0.09          | 0.12          |
| PCN-Fe | 0.11          | 0.15          |
| PCN-Co | 0.27          | 0.33          |
| PCN-Ni | 0.15          | 0.15          |
| PCN-Cu | 0.11          | 0.12          |
| PCN-Zn | 0.24          | 0.24          |
| PCN-Ag | 0.06          | 0.06          |
| PCN-Au | 0.06          | 0.07          |
| PCN-Pt | 0.24          | 0.37          |
| PCN-Pd | 0.10          | 0.11          |

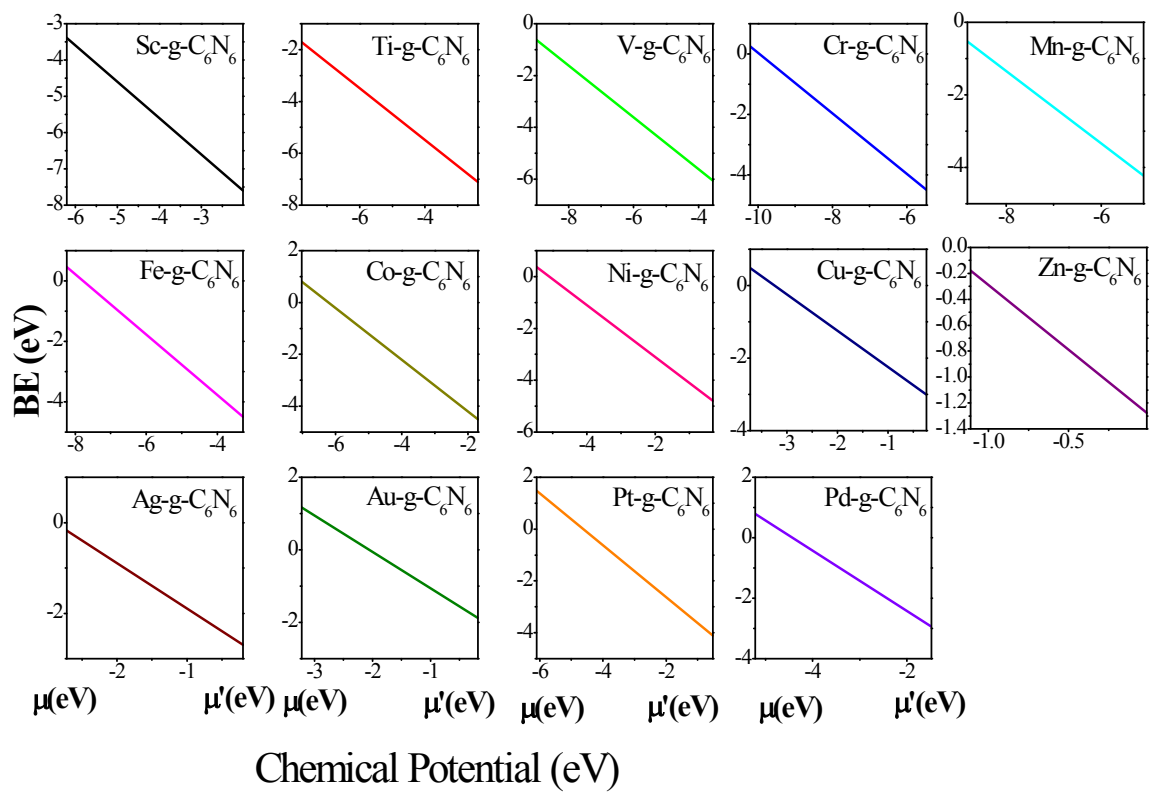

**Figure S1:** Variation of metal binding energy to the g-C<sub>3</sub>N<sub>3</sub> surface with the chemical potential of the metal varied from bulk metal to isolated metal atom.
